# Supplementary material for: Octarepeat region flexibility impacts prion function, endoproteolysis and disease manifestation
Source: PubMed Central journal article supplement (PMC4364950; doi:10.15252/emmm.201404588), 2015-02-06

Figure S2

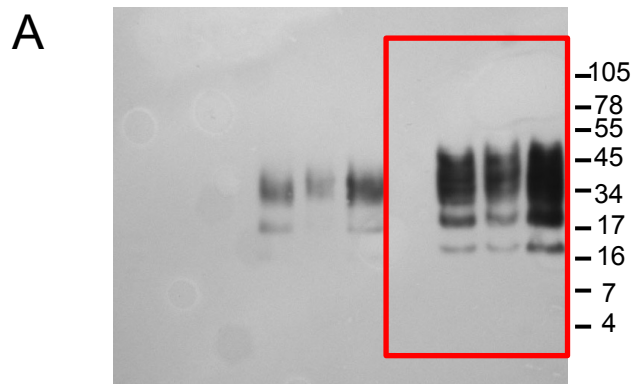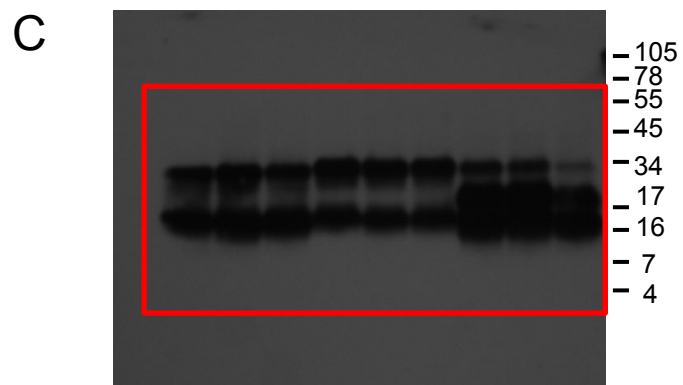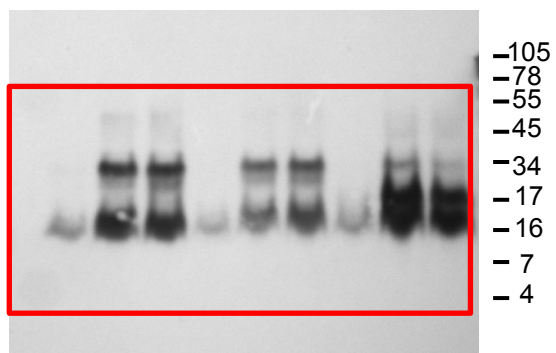

Supplement: emmm0007-0339-sd14.pdf [file emmm0007-0339-sd14.pdf]
