# Supplementary material for: Octarepeat region flexibility impacts prion function, endoproteolysis and disease manifestation
Source: PubMed Central journal article supplement (PMC4364950; doi:10.15252/emmm.201404588), 2015-02-06

Figure S4A

CaEDTA

TEPA

TTM

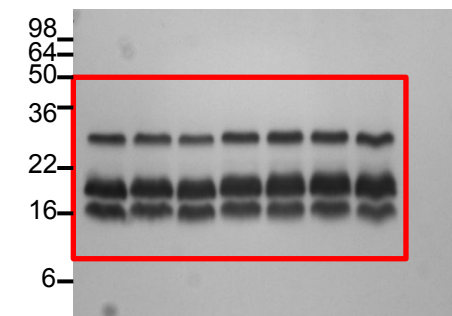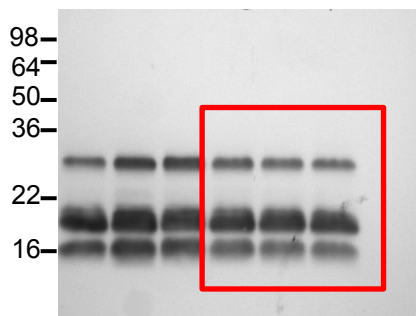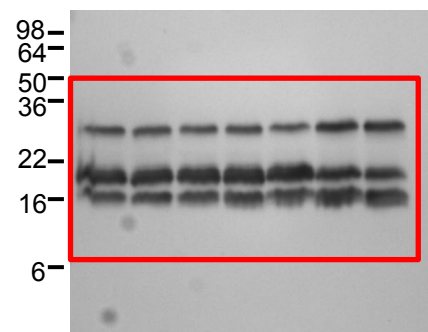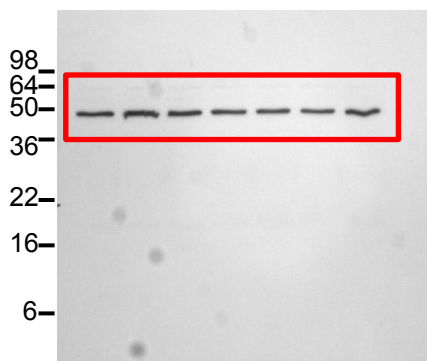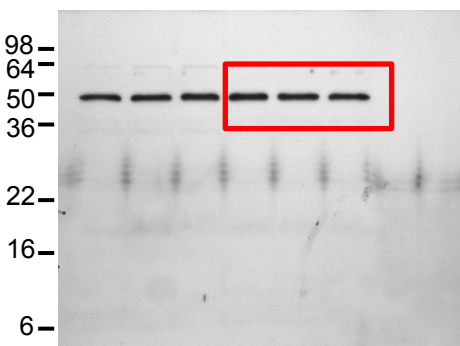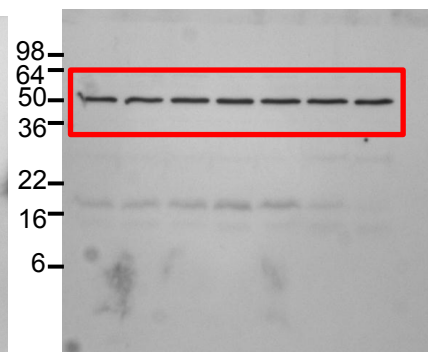

Figure S4B

CaEDTA

TEPA

TTM

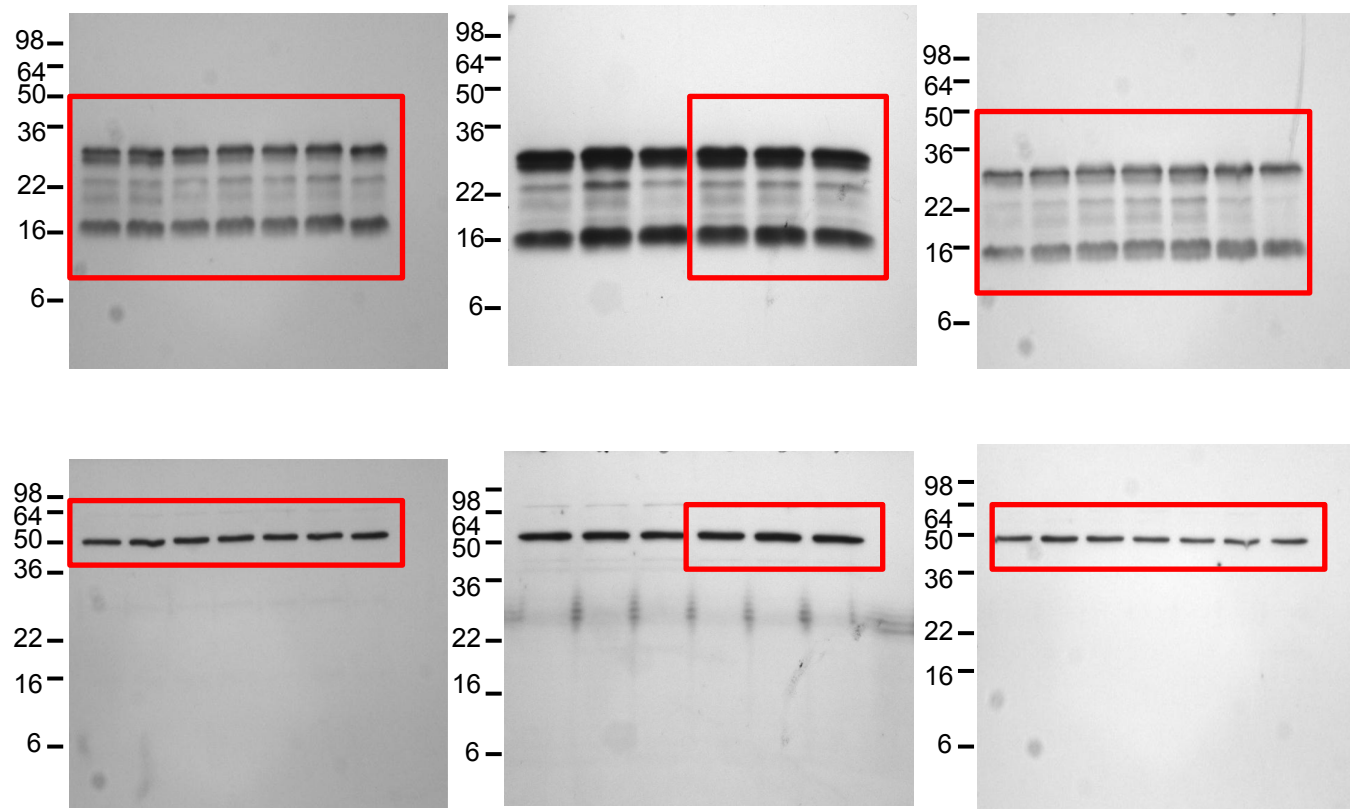

Supplement: emmm0007-0339-sd16.pdf [file emmm0007-0339-sd16.pdf]
