# Supplementary material for: Octarepeat region flexibility impacts prion function, endoproteolysis and disease manifestation
Source: PubMed Central journal article supplement (PMC4364950; doi:10.15252/emmm.201404588), 2015-02-06
Supplement: emmm0007-0339-sd19.pdf [file emmm0007-0339-sd19.pdf]

# Figure S9

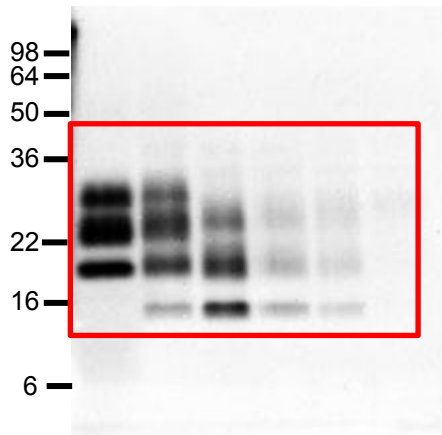

TgPrP(S3)-14

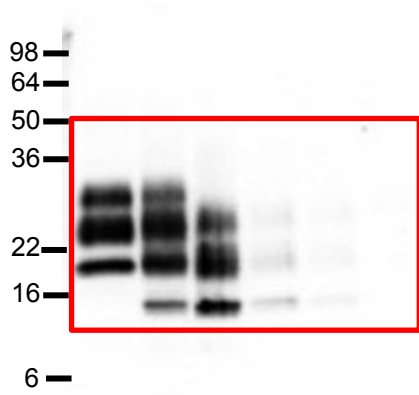

TgPrP(S3)-35

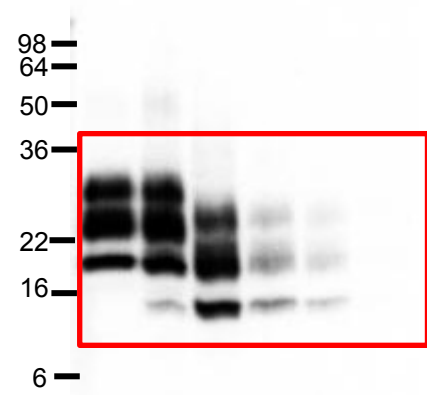

TgPrP(S1)-17

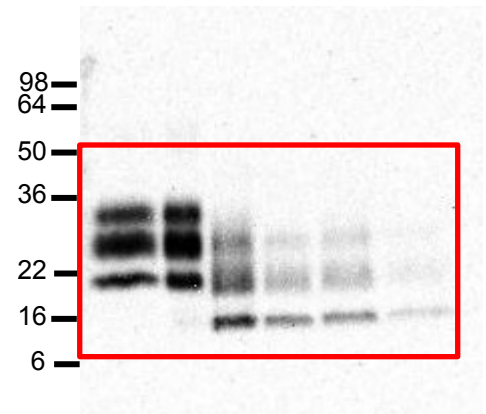

RML
