# Supplementary material for: Octarepeat region flexibility impacts prion function, endoproteolysis and disease manifestation
Source: PubMed Central journal article supplement (PMC4364950; doi:10.15252/emmm.201404588), 2015-02-06

Figure 2A

Sha31

9A2

12B2

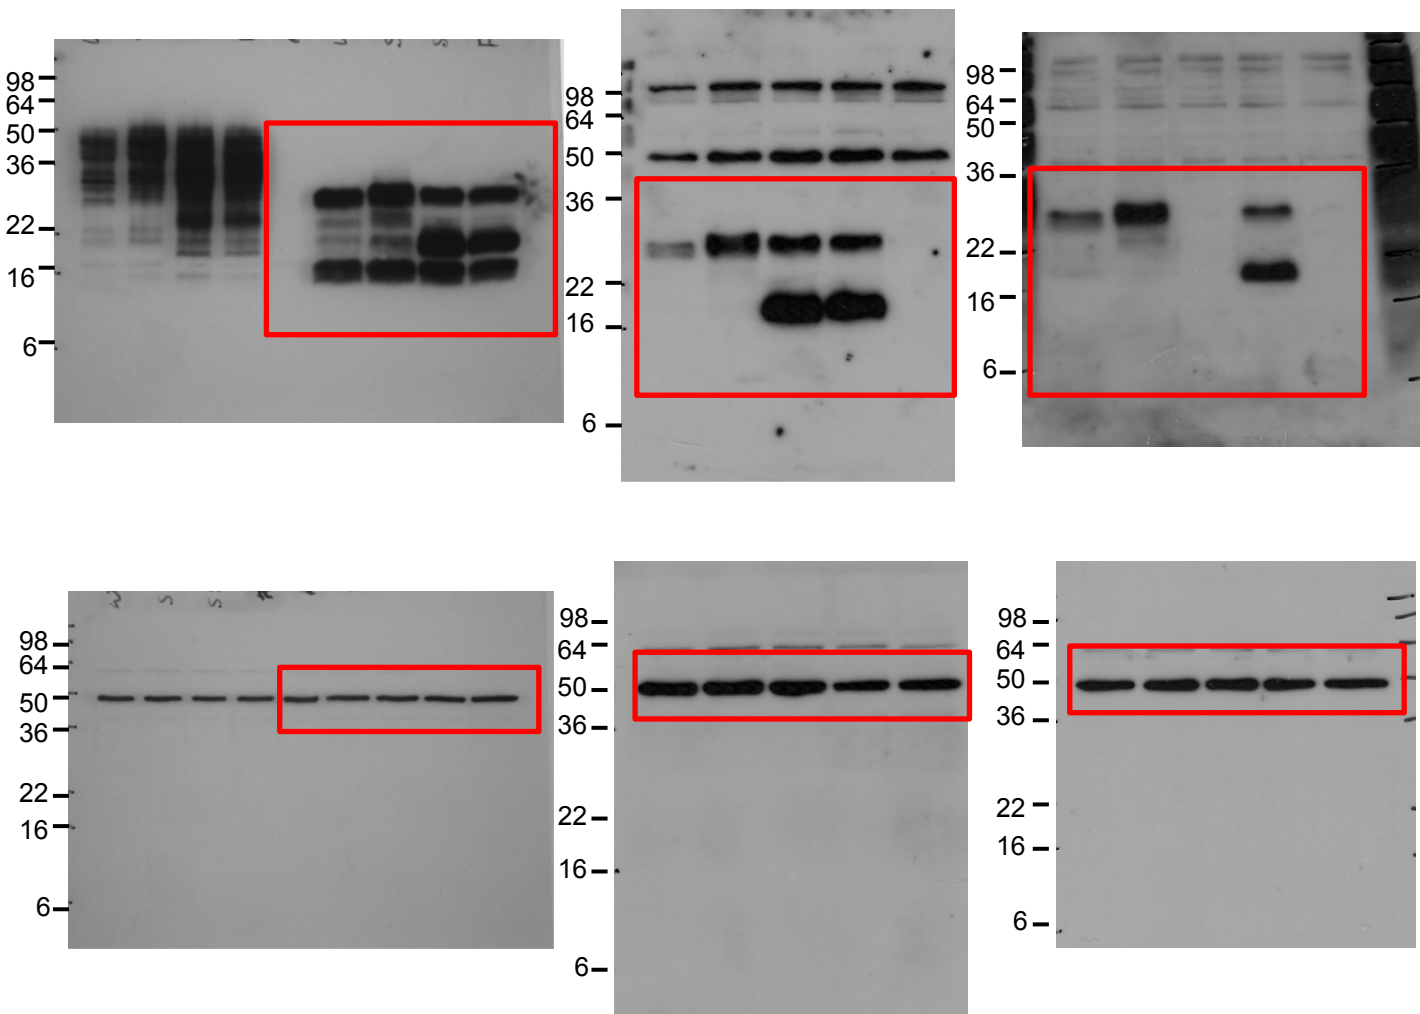

Figure 2B

Figure 2C

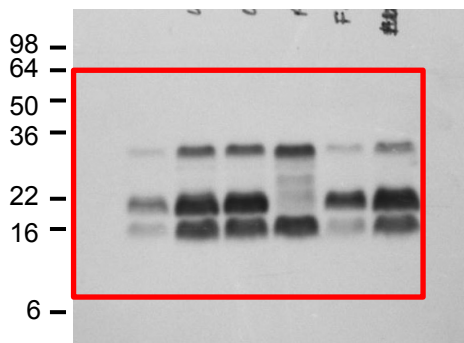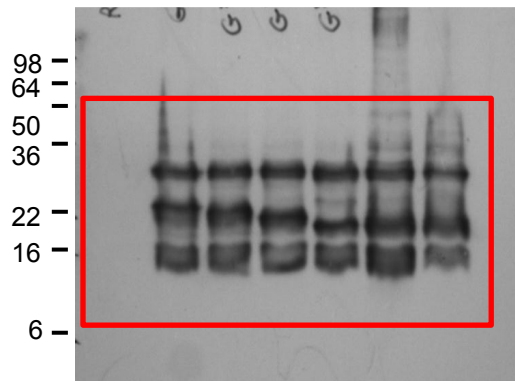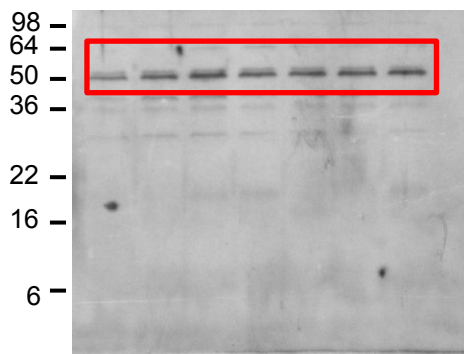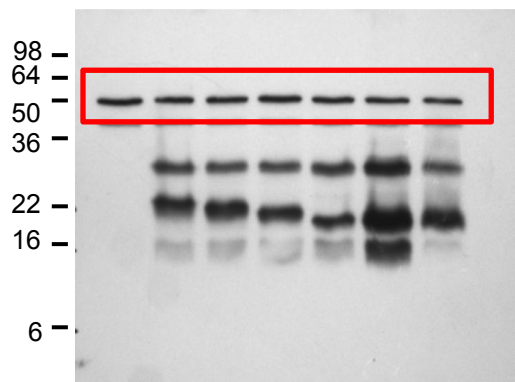

Figure 2D

SMB-PS

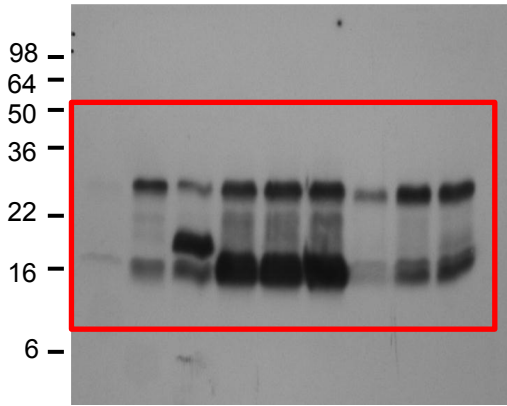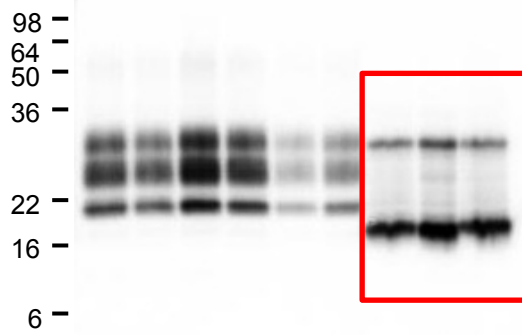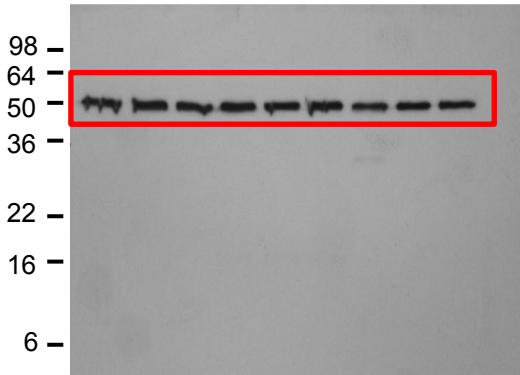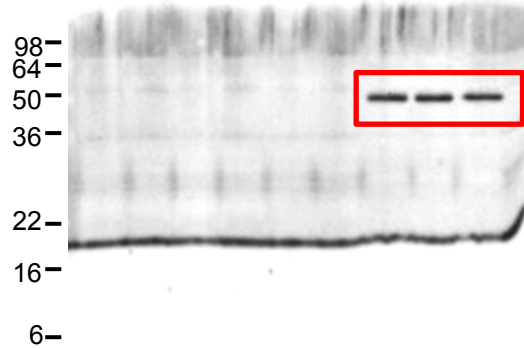

SH-SY5Y

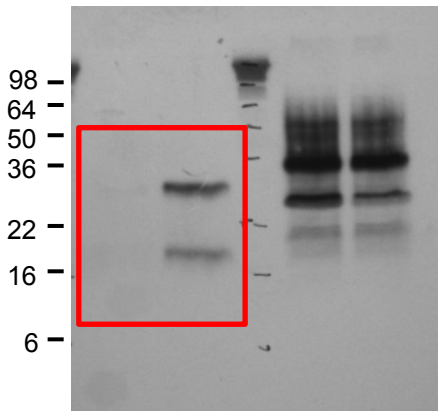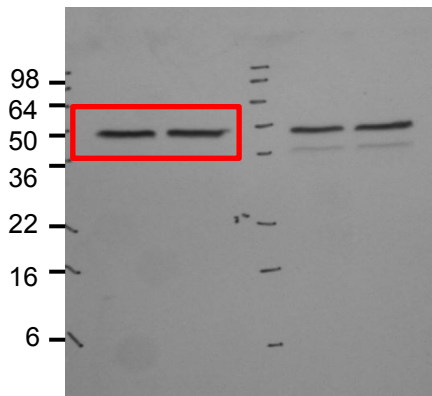

Figure 2E

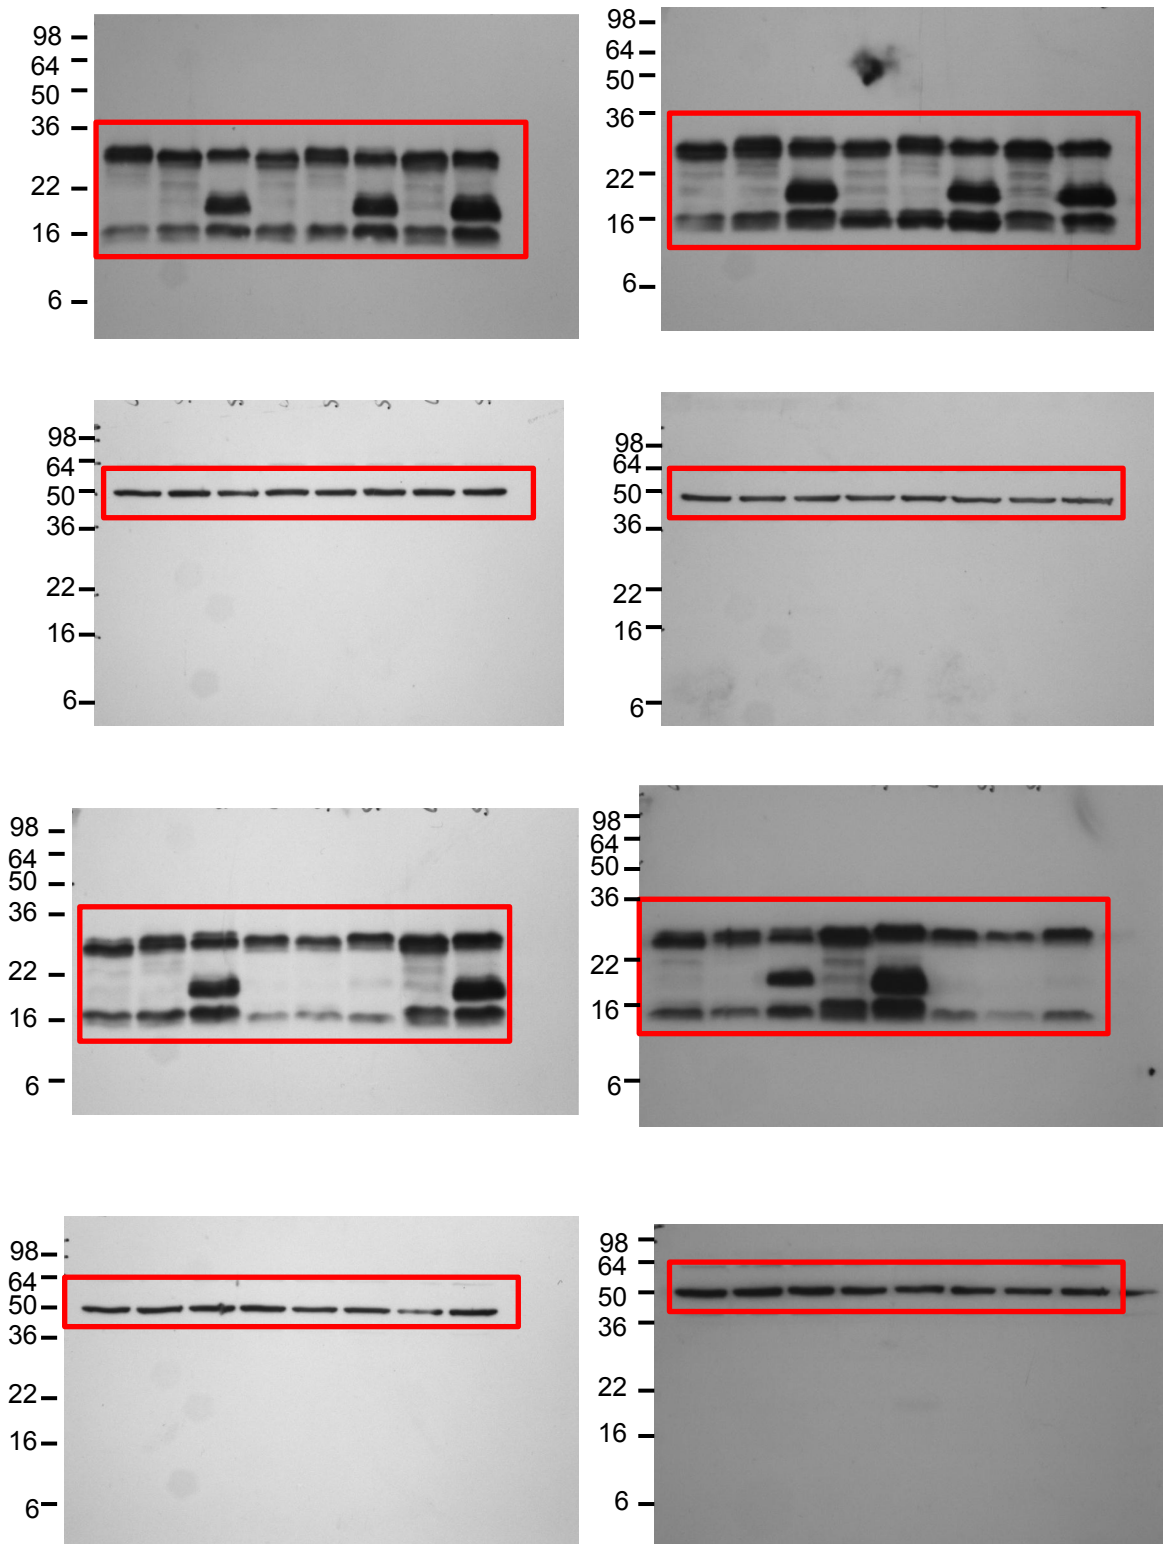

Supplement: emmm0007-0339-sd21.pdf [file emmm0007-0339-sd21.pdf]
