# Supplementary material for: Octarepeat region flexibility impacts prion function, endoproteolysis and disease manifestation
Source: PubMed Central journal article supplement (PMC4364950; doi:10.15252/emmm.201404588), 2015-02-06
Supplement: emmm0007-0339-sd22.pdf [file emmm0007-0339-sd22.pdf]

Figure 3A

Sha31

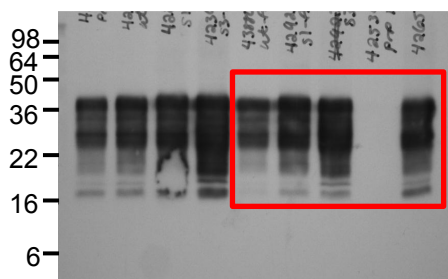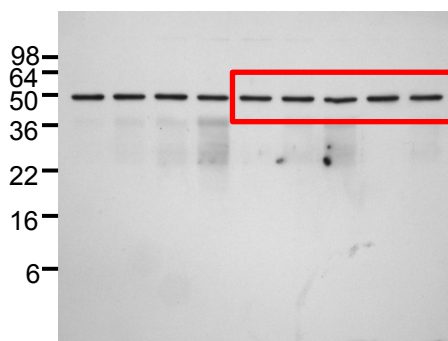

12B2

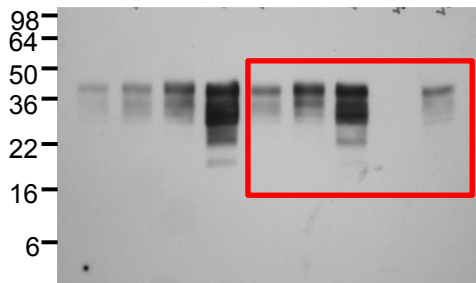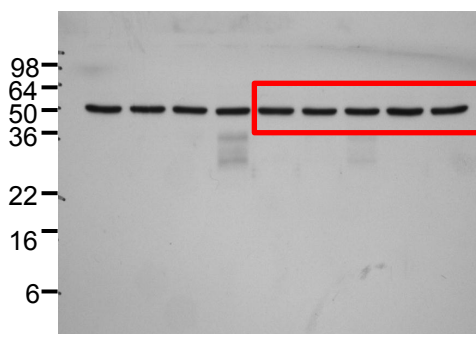

9A2

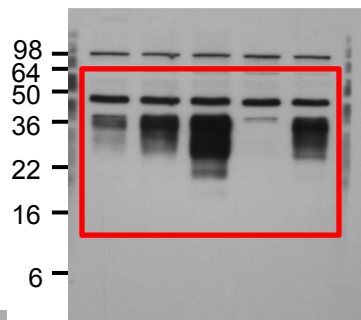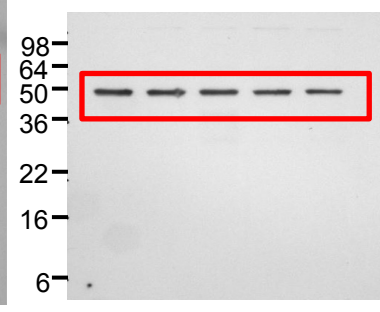

Sha31 PNGaseF

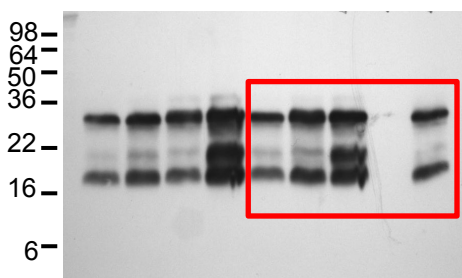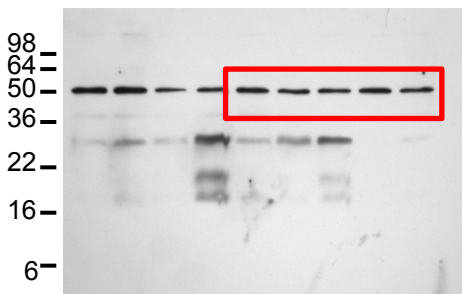

12B2 PNGaseF

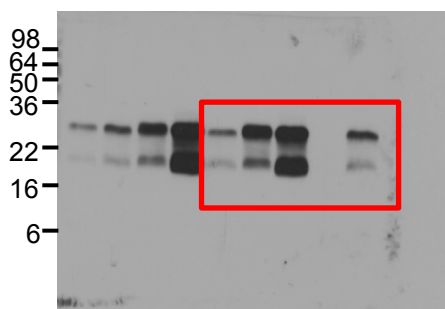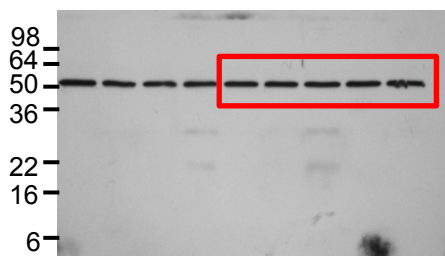

9A2 PNGaseF

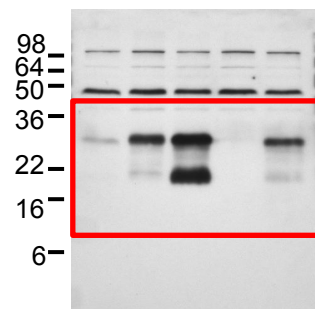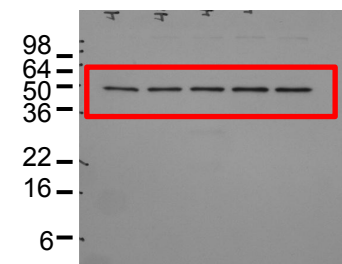

Figure 3C

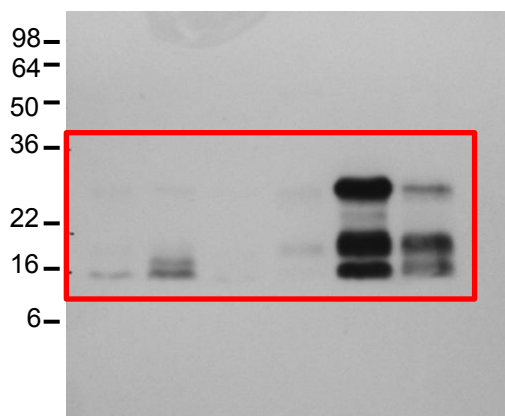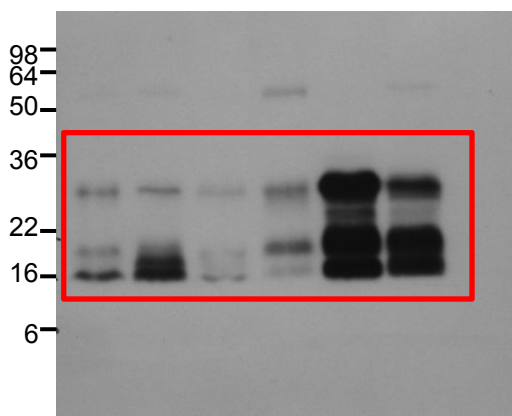

Higher exposure
